# Supplementary material
Source: PubMed Central journal article supplement (PMC3370151)
Supplement: NIHMS371820-supplement-1.pdf [file NIHMS371820-supplement-1.pdf]

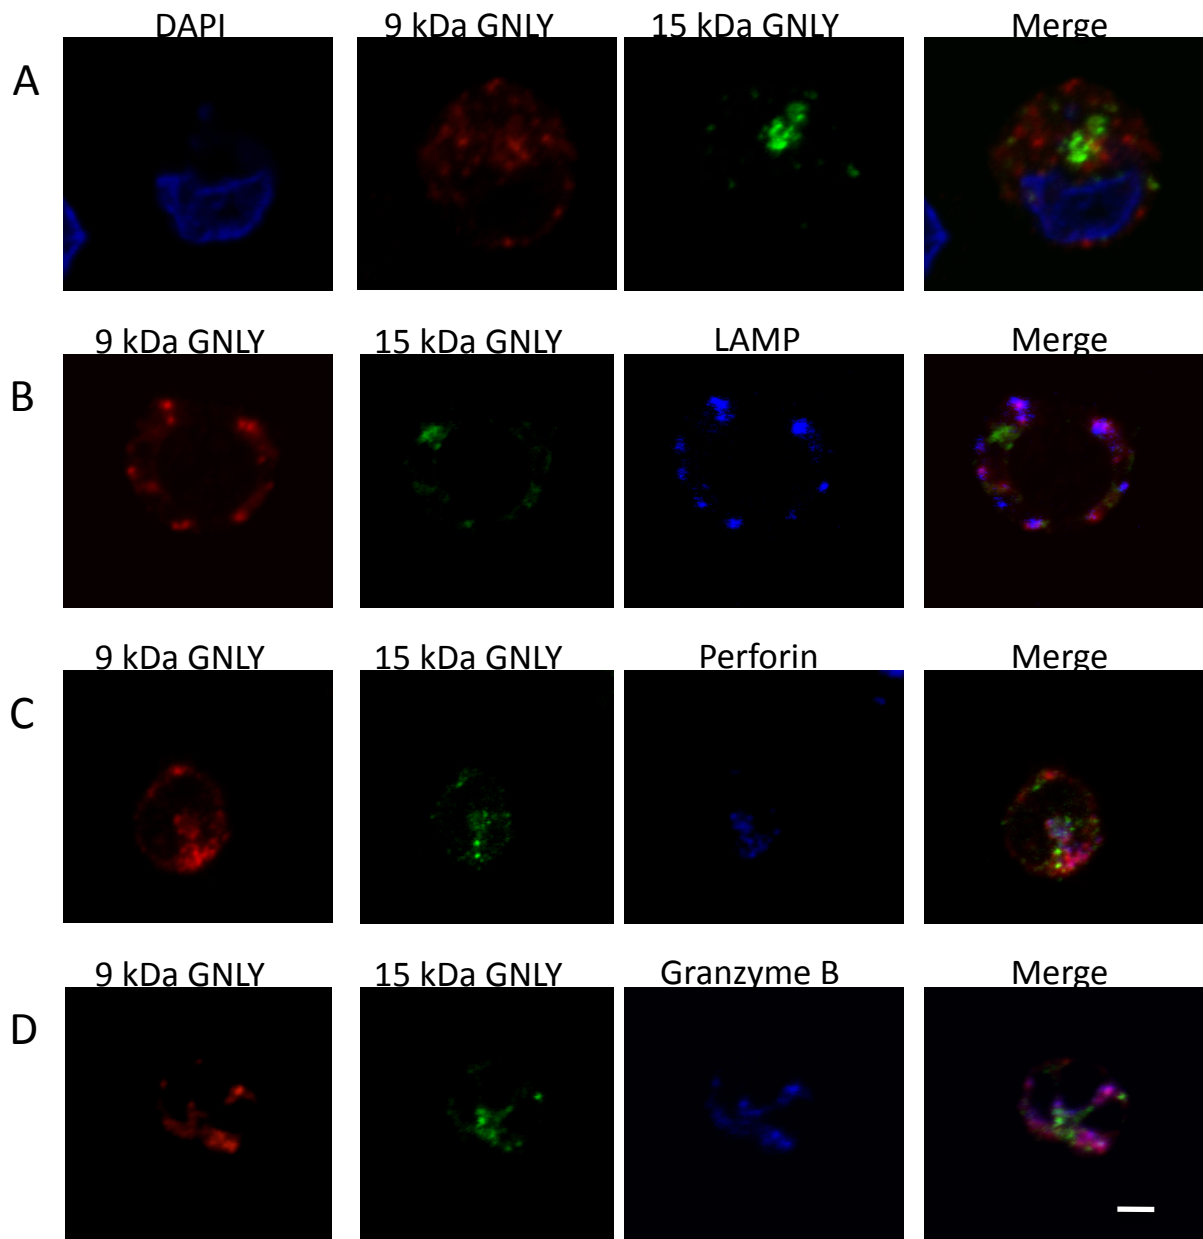

Supplemental Figure 1

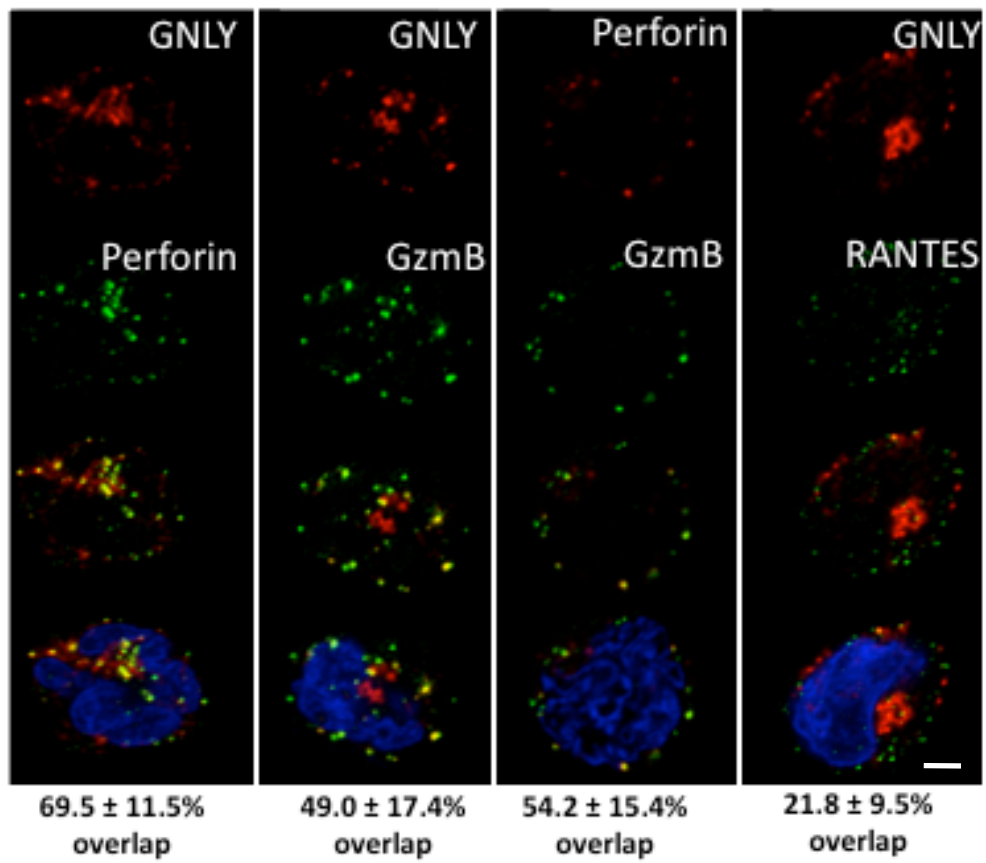

Supplemental Figure 2

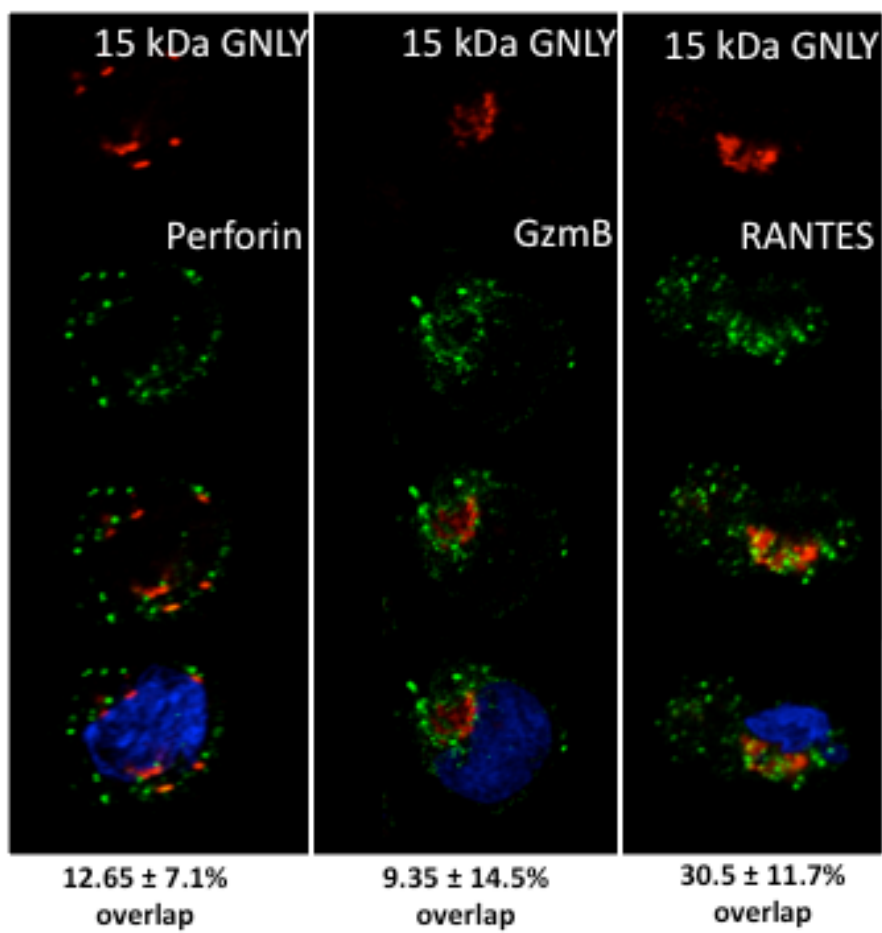

Supplemental Figure 3

## **Supplementary Figure Legends**

Supplementary Figure 1. 9 kDa granulysin co-localizes with LAMP-1, granzyme B and perforin while 15 kDa granulysin is present in a distinct compartment in human NK cells. A-D, Freshly isolated NK cells were stained and analyzed by confocal microscopy. Bar indicates 1  $\mu$ . Results are representative of 3 similar experiments.

Supplementary Figure 2. NK92 cells were stained with antibodies recognizing 9 kDa granulysin (GNLY), granzyme B (GzmB), Perforin, and RANTES and analyzed by confocal microscopy. Bar indicates 1  $\mu$ . Results are representative of 3 similar experiments.

Supplementary Figure 3. NK92 cells were stained with antibodies recognizing 15 kDa granulysin (GNLY), granzyme B (GzmB), Perforin, and RANTES and analyzed by confocal microscopy. Bar indicates 1  $\mu$ . Results are representative of 3 similar experiments.

## **Supplementary Figure Legends**

Supplementary Figure 1. 9 kDa granulysin co-localizes with LAMP-1, granzyme B and perforin while 15 kDa granulysin is present in a distinct compartment in human NK cells. A-D, Freshly isolated NK cells were stained and analyzed by confocal microscopy. Bar indicates 1  $\mu$ . Results are representative of 3 similar experiments.

Supplementary Figure 2. NK92 cells were stained with antibodies recognizing 9 kDa granulysin (GNLY), granzyme B (GzmB), Perforin, and RANTES and analyzed by confocal microscopy. Bar indicates 1  $\mu$ . Results are representative of 3 similar experiments.

Supplementary Figure 3. NK92 cells were stained with antibodies recognizing 15 kDa granulysin (GNLY), granzyme B (GzmB), Perforin, and RANTES and analyzed by confocal microscopy. Bar indicates 1  $\mu$ . Results are representative of 3 similar experiments.
